# Supplementary material for: Optimization of metal-to-insulator phase transition properties in polycrystalline VO2 films for terahertz modulation applications by doping
Source: Royal Society of Chemistry journal article supplement (doi:10.1039/c7tc05536f), 2018-01-01
Supplement: c7tc05536f1.pdf [file c7tc05536f1.pdf]

## Electronic Supplementary Information

### **Optimization of metal-to-insulator phase transition properties in polycrystalline VO<sub>2</sub> films for terahertz modulation applications by doping**

Chunhui Ji<sup>a</sup>, Zhiming Wu<sup>a,\*</sup>, Xuefei Wu<sup>a,b</sup>, Haoqian Feng<sup>a</sup>, Jun Wang<sup>a,\*</sup>, Zehua Huang<sup>a</sup>,  
Hongxi Zhou<sup>a</sup>, Wei Yao<sup>a</sup>, Jun Gou<sup>a</sup>, and Yadong Jiang<sup>a</sup>

a. School of Optoelectronic Information, State Key Laboratory of Electronic Thin  
Films and Integrated Devices, University of Electronic Science and Technology of  
China, Chengdu 610054, China.

b. Department of Mechanical Engineering, Boston University, Boston, Massachusetts,  
02215, USA

\*E-mail: zmwu@uestc.edu.cn; wjun@uestc.edu.cn; Fax: +86 28 8320 6123; Tel: +86  
28 8320 1831

Table S1 Electrical MIT Properties of VO<sub>2</sub> samples obtained at different Nb contents.

| sample | Nb Content (%) | T <sub>TH</sub> (°C) | T <sub>TC</sub> (°C) | T <sub>C</sub> (°C) | ΔH (°C) | FWHM (°C) |         |
|--------|----------------|----------------------|----------------------|---------------------|---------|-----------|---------|
|        |                |                      |                      |                     |         | Heating   | cooling |
| S1     | 0.0            | 70.8                 | 53.6                 | 62.2                | 17.2    | 6.1       | 8.6     |
| S2     | 2.6            | 52.0                 | 44.2                 | 48.1                | 7.8     | 6.3       | 6.8     |
| S3     | 4.3            | 44.8                 | 37.9                 | 41.35               | 6.9     | 6.8       | 6.9     |
| S4     | 6.5            | 35.9                 | 30.7                 | 33.3                | 5.2     | 9.7       | 9.4     |

Table S2 Electrical MIT Properties of VO<sub>2</sub> samples obtained at different W contents.

| sample | W content (%) | T <sub>TH</sub> (°C) | T <sub>TC</sub> (°C) | T <sub>C</sub> (°C) | ΔH (°C) | FWHM (°C) |         |
|--------|---------------|----------------------|----------------------|---------------------|---------|-----------|---------|
|        |               |                      |                      |                     |         | Heating   | cooling |
| S5     | 0.0           | 72.3                 | 56.1                 | 64.2                | 16.2    | 6.2       | 7.5     |
| S6     | 1.1           | 64.6                 | 52.3                 | 58.45               | 12.3    | 7.8       | 6.9     |
| S7     | 1.5           | 49.2                 | 42.3                 | 45.75               | 6.9     | 8.3       | 10.1    |
